# Supplementary material for: Morphological diversity of medusan lineages constrained by animal–fluid interactions
Source: Oxford University Press journal article supplement (doi:10.1242/jeb.003772), 2007-05-21
Supplement: jeb003772tables1.pdf [file jeb003772tables1.pdf]

Table S1. *Morphospace computed for 660 extant species of medusae*

| Species                          | Bell height $H$ (mm) | Bell diameter $D$ (mm) | Fineness ratio $H/D$ |
|----------------------------------|----------------------|------------------------|----------------------|
| <i>Abyla bicarinata</i>          | 13.3                 | 12.4                   | 1.1                  |
| <i>Abyla haeckeli</i>            | 5.8                  | 6.0                    | 1.0                  |
| <i>Abyla trigona</i>             | 7.5                  | 5.1                    | 1.5                  |
| <i>Abylopsis eschscholtzi</i>    | 7.6                  | 5.7                    | 1.3                  |
| <i>Abylopsis tetragona</i>       | 4.9                  | 3.7                    | 1.3                  |
| <i>Aeginodiscus actinodiscus</i> | 13.0                 | 40.0                   | 0.3                  |
| <i>Aeginura beebei</i>           | 18.0                 | 100.0                  | 0.2                  |
| <i>Aequorea albida</i>           | 30.0                 | 60.0                   | 0.5                  |
| <i>Aequorea australis</i>        | 6.7                  | 18.0                   | 0.4                  |
| <i>Aequorea conica</i>           | 11.0                 | 9.0                    | 1.2                  |
| <i>Aequorea floridiana</i>       | 14.8                 | 40.0                   | 0.4                  |
| <i>Aequorea parva</i>            | 4.0                  | 6.0                    | 0.7                  |
| <i>Aequorea tennuis</i>          | 25.7                 | 90.0                   | 0.3                  |
| <i>Aequorea victoria</i>         | 35.0                 | 70.0                   | 0.5                  |
| <i>Aequorea vitrina</i>          | 50.0                 | 135.0                  | 0.4                  |
| <i>Agalma elegans</i>            | 8.8                  | 8.6                    | 1.0                  |
| <i>Agalma okeni</i>              | 4.4                  | 4.7                    | 0.9                  |
| <i>Agastra mira</i>              | 1.0                  | 1.0                    | 1.0                  |
| <i>Agastra rubra</i>             | 0.8                  | 1.0                    | 0.8                  |
| <i>Aglantha digitale</i>         | 30.0                 | 15.0                   | 2.0                  |
| <i>Aglantha ignea</i>            | 14.0                 | 7.0                    | 2.0                  |
| <i>Aglantha intermedia</i>       | 15.0                 | 14.0                   | 1.1                  |
| <i>Aglaura hemistoma</i>         | 5.0                  | 3.5                    | 1.4                  |
| <i>Aglauroopsis conanti</i>      | 15.0                 | 22.0                   | 0.7                  |
| <i>Aglauroopsis jarli</i>        | 4.0                  | 4.0                    | 1.0                  |
| <i>Amphicaryon acaule</i>        | 10.3                 | 7.4                    | 1.4                  |
| <i>Amphicaryon ernesti</i>       | 9.2                  | 5.7                    | 1.6                  |
| <i>Amphicaryon peltifera</i>     | 4.3                  | 2.6                    | 1.6                  |
| <i>Amphinema australis</i>       | 3.0                  | 2.5                    | 1.2                  |
| <i>Amphinema dinema</i>          | 6.0                  | 4.0                    | 1.5                  |
| <i>Amphinema krampi</i>          | 6.0                  | 4.0                    | 1.5                  |
| <i>Amphinema physophorum</i>     | 2.0                  | 1.8                    | 1.1                  |
| <i>Amphinema rubrum</i>          | 7.0                  | 4.5                    | 1.6                  |
| <i>Amphinema rugosum</i>         | 5.0                  | 3.0                    | 1.7                  |
| <i>Amphinema turrida</i>         | 5.5                  | 5.3                    | 1.0                  |
| <i>Amphogona apicata</i>         | 8.0                  | 7.0                    | 1.1                  |
| <i>Annatiara affinis</i>         | 12.0                 | 14.5                   | 0.8                  |
| <i>Apolemia uvaria</i>           | 21.8                 | 17.7                   | 1.2                  |
| <i>Archirhiza aurosa</i>         | 14.0                 | 40.0                   | 0.4                  |
| <i>Arctapodema ampla</i>         | 5.6                  | 15.0                   | 0.4                  |
| <i>Arctapodema australis</i>     | 14.0                 | 23.0                   | 0.6                  |
| <i>Atolla bairdii</i>            | 46.7                 | 144.0                  | 0.3                  |
| <i>Atolla chuni</i>              | 15.0                 | 50.0                   | 0.3                  |
| <i>Atolla wyvillei</i>           | 31.5                 | 73.0                   | 0.4                  |
| <i>Atolla wyvillei</i>           | 26.0                 | 55.0                   | 0.5                  |
| <i>Atorella vanhoffeni</i>       | 3.0                  | 7.0                    | 0.4                  |
| <i>Aurelia aurita</i>            | 125.0                | 400.0                  | 0.3                  |
| <i>Aurelia clausa</i>            | 50.0                 | 100.0                  | 0.5                  |
| <i>Aurelia colpota</i>           | 50.0                 | 120.0                  | 0.4                  |
| <i>Aurelia cruciata</i>          | 120.0                | 400.0                  | 0.3                  |
| <i>Aurelia dubia</i>             | 43.0                 | 130.0                  | 0.3                  |
| <i>Aurelia flavidula</i>         | 90.0                 | 250.0                  | 0.4                  |
| <i>Aurelia hyalina</i>           | 30.0                 | 80.0                   | 0.4                  |
| <i>Aurelia labiata</i>           | 200.0                | 300.0                  | 0.7                  |
| <i>Aurelia limbata</i>           | 150.0                | 300.0                  | 0.5                  |
| <i>Aurelia maldivensis</i>       | 90.0                 | 250.0                  | 0.4                  |
| <i>Aurelia marginalis</i>        | 120.0                | 300.0                  | 0.4                  |
| <i>Aurelia solida</i>            | 40.0                 | 80.0                   | 0.5                  |
| <i>Aurelia vitiana</i>           | 40.0                 | 80.0                   | 0.5                  |

|                                       |       |       |     |
|---------------------------------------|-------|-------|-----|
| <i>Aurosa furcata</i>                 | 30.0  | 80.0  | 0.4 |
| <i>Bargmannia elongata</i>            | 12.8  | 7.0   | 1.8 |
| <i>Bassia bassenisi</i>               | 6.3   | 5.7   | 1.1 |
| <i>Bougainvillia bitentaculata</i>    | 1.0   | 0.8   | 1.3 |
| <i>Bougainvillia bougainvillei</i>    | 9.0   | 8.0   | 1.1 |
| <i>Bougainvillia britannica</i>       | 12.0  | 10.0  | 1.2 |
| <i>Bougainvillia carolinensis</i>     | 4.0   | 4.0   | 1.0 |
| <i>Bougainvillia flavida</i>          | 2.0   | 3.0   | 0.7 |
| <i>Bougainvillia frondosa</i>         | 2.0   | 1.3   | 1.6 |
| <i>Bougainvillia fulva</i>            | 14.0  | 11.0  | 1.3 |
| <i>Bougainvillia involuta</i>         | 4.0   | 4.5   | 0.9 |
| <i>Bougainvillia macloviana</i>       | 15.0  | 13.0  | 1.2 |
| <i>Bougainvillia maniculata</i>       | 1.5   | 1.5   | 1.0 |
| <i>Bougainvillia multicilia</i>       | 6.0   | 5.0   | 1.2 |
| <i>Bougainvillia multitentaculata</i> | 10.0  | 10.0  | 1.0 |
| <i>Bougainvillia niobe</i>            | 7.0   | 5.0   | 1.4 |
| <i>Bougainvillia nordgaardi</i>       | 4.5   | 4.5   | 1.0 |
| <i>Bougainvillia polygaster</i>       | 12.0  | 12.0  | 1.0 |
| <i>Bougainvillia principis</i>        | 10.0  | 10.0  | 1.0 |
| <i>Bougainvillia prolifera</i>        | 3.0   | 2.5   | 1.2 |
| <i>Bougainvillia pyramidata</i>       | 5.0   | 5.0   | 1.0 |
| <i>Bougainvillia ramosa</i>           | 2.8   | 2.8   | 1.0 |
| <i>Bougainvillia superciliaris</i>    | 8.0   | 8.0   | 1.0 |
| <i>Bythocellata cruciformis</i>       | 4.0   | 3.5   | 1.1 |
| <i>Bythocellata murrayi</i>           | 20.0  | 20.0  | 1.0 |
| <i>Calycopsis bigelowi</i>            | 16.0  | 16.0  | 1.0 |
| <i>Calycopsis borchgrevinki</i>       | 20.0  | 16.5  | 1.2 |
| <i>Calycopsis chuni</i>               | 38.0  | 30.0  | 1.3 |
| <i>Calycopsis gara</i>                | 11.0  | 9.0   | 1.2 |
| <i>Calycopsis krampi</i>              | 5.0   | 3.0   | 1.7 |
| <i>Calycopsis papillata</i>           | 30.0  | 26.0  | 1.2 |
| <i>Calycopsis simplex</i>             | 8.0   | 8.0   | 1.0 |
| <i>Calycopsis simulans</i>            | 30.0  | 22.0  | 1.4 |
| <i>Calycopsis typa</i>                | 37.0  | 40.0  | 0.9 |
| <i>Cannorhiza connexa</i>             | 30.0  | 80.0  | 0.4 |
| <i>Cannota dodecantha</i>             | 4.0   | 4.0   | 1.0 |
| <i>Carybdea alata</i>                 | 60.0  | 50.0  | 1.2 |
| <i>Carybdea grandis</i>               | 230.0 | 140.0 | 1.6 |
| <i>Carybdea marsupialis</i>           | 40.0  | 30.0  | 1.3 |
| <i>Carybdea moseri</i>                | 80.0  | 47.0  | 1.7 |
| <i>Carybdea murrayana</i>             | 60.0  | 50.0  | 1.2 |
| <i>Carybdea pyramis</i>               | 30.0  | 20.0  | 1.5 |
| <i>Carybdea rastonii</i>              | 35.0  | 30.0  | 1.2 |
| <i>Carybdea xaymacana</i>             | 23.0  | 15.0  | 1.5 |
| <i>Cassiopea andromeda</i>            | 30.0  | 120.0 | 0.3 |
| <i>Cassiopea depressa</i>             | 20.0  | 120.0 | 0.2 |
| <i>Cassiopea frondosa</i>             | 37.1  | 260.0 | 0.1 |
| <i>Cassiopea mertensii</i>            | 40.0  | 120.0 | 0.3 |
| <i>Cassiopea ornata</i>               | 40.0  | 120.0 | 0.3 |
| <i>Cassiopea xamachana</i>            | 62.2  | 240.0 | 0.3 |
| <i>Catablema multicirratum</i>        | 30.0  | 35.0  | 0.9 |
| <i>Catablema vesicarium</i>           | 25.0  | 30.0  | 0.8 |
| <i>Catostylus cruciatus</i>           | 75.0  | 150.0 | 0.5 |
| <i>Catostylus flagellata</i>          | 40.0  | 80.0  | 0.5 |
| <i>Catostylus mosaicus</i>            | 175.0 | 350.0 | 0.5 |
| <i>Catostylus orsini</i>              | 22.8  | 65.0  | 0.4 |
| <i>Catostylus palmipes</i>            | 32.0  | 64.0  | 0.5 |
| <i>Catostylus pictonum</i>            | 148.0 | 400.0 | 0.4 |
| <i>Catostylus purpurus</i>            | 35.0  | 115.0 | 0.3 |
| <i>Catostylus stiphropterus</i>       | 30.0  | 100.0 | 0.3 |
| <i>Catostylus stuhlmanni</i>          | 100.0 | 200.0 | 0.5 |
| <i>Catostylus tagi</i>                | 185.0 | 500.0 | 0.4 |
| <i>Catostylus tripterus</i>           | 25.0  | 50.0  | 0.5 |

|                                  |       |       |     |
|----------------------------------|-------|-------|-----|
| <i>Catostylus viridescens</i>    | 40.0  | 80.0  | 0.5 |
| <i>Cephea cephea conifera</i>    | 40.0  | 120.0 | 0.3 |
| <i>Cephea caerulea</i>           | 7.7   | 57.0  | 0.1 |
| <i>Cephea cephea</i>             | 22.6  | 140.0 | 0.2 |
| <i>Cephea octostyla</i>          | 20.0  | 90.0  | 0.2 |
| <i>Cephea setouchiana</i>        | 21.3  | 200.0 | 0.1 |
| <i>Cephea setouchiana</i>        | 92.3  | 300.0 | 0.3 |
| <i>Ceratocymba dentata</i>       | 13.1  | 11.9  | 1.1 |
| <i>Ceratocymba leuckarti</i>     | 5.4   | 3.1   | 1.8 |
| <i>Ceratocymba sagittata</i>     | 17.3  | 6.9   | 2.5 |
| <i>Chelophyes appendiculata</i>  | 10.9  | 4.0   | 2.7 |
| <i>Chelophyes contorta</i>       | 9.6   | 3.7   | 2.6 |
| <i>Chiarella centripetalis</i>   | 20.0  | 12.5  | 1.6 |
| <i>Chirodropus gorilla</i>       | 150.0 | 120.0 | 1.3 |
| <i>Chirodropus palmatus</i>      | 100.0 | 70.0  | 1.4 |
| <i>Chiropsalmus buitendijki</i>  | 65.0  | 70.0  | 0.9 |
| <i>Chiropsalmus quadrigatus</i>  | 97.0  | 100.0 | 1.0 |
| <i>Chiropsalmus quadrumanus</i>  | 100.0 | 140.0 | 0.7 |
| <i>Chiropsalmus zygonema</i>     | 60.0  | 40.0  | 1.5 |
| <i>Chromatonema rubrum</i>       | 22.0  | 27.0  | 0.8 |
| <i>Chrysaora blossevillii</i>    | 40.0  | 100.0 | 0.4 |
| <i>Chrysaora calliparea</i>      | 100.0 | 200.0 | 0.5 |
| <i>Chrysaora chinensis</i>       | 30.0  | 70.0  | 0.4 |
| <i>Chrysaora fulgida</i>         | 200.0 | 400.0 | 0.5 |
| <i>Chrysaora helvola</i>         | 50.0  | 300.0 | 0.2 |
| <i>Chrysaora hysocella</i>       | 60.0  | 200.0 | 0.3 |
| <i>Chrysaora mediterranea</i>    | 80.0  | 300.0 | 0.3 |
| <i>Chrysaora melanaster</i>      | 150.0 | 300.0 | 0.5 |
| <i>Chrysaora plocamia</i>        | 50.0  | 100.0 | 0.5 |
| <i>Chuniphyes moserae</i>        | 26.2  | 11.3  | 2.3 |
| <i>Chuniphyes multidentata</i>   | 25.5  | 11.3  | 2.3 |
| <i>Cirrholovenia polynema</i>    | 3.5   | 7.0   | 0.5 |
| <i>Cirrholovenia tetranema</i>   | 1.5   | 1.5   | 1.0 |
| <i>Cladonema californicum</i>    | 2.5   | 2.4   | 1.0 |
| <i>Cladonema pacificum</i>       | 2.0   | 2.2   | 0.9 |
| <i>Cladonema radiatum</i>        | 4.0   | 3.0   | 1.3 |
| <i>Clausophyes galeata</i>       | 17.1  | 12.4  | 1.4 |
| <i>Clausophyes laetmata</i>      | 7.6   | 6.2   | 1.2 |
| <i>Clausophyes moserae</i>       | 6.5   | 2.9   | 2.2 |
| <i>Clausophyes tropica</i>       | 19.1  | 8.2   | 2.3 |
| <i>Climacocodon ikarii</i>       | 1.1   | 0.6   | 1.8 |
| <i>Cnidotiara gotoi</i>          | 8.0   | 4.0   | 2.0 |
| <i>Codonorchis octaedrus</i>     | 4.0   | 2.5   | 1.6 |
| <i>Colobonema sericeum</i>       | 35.0  | 45.0  | 0.8 |
| <i>Colobonema typicum</i>        | 12.0  | 20.0  | 0.6 |
| <i>Cordagalma cordiforme</i>     | 2.0   | 1.4   | 1.4 |
| <i>Cosmetira pilosella</i>       | 17.0  | 34.0  | 0.5 |
| <i>Cosmetirella davisii</i>      | 30.0  | 60.0  | 0.5 |
| <i>Cotylorhiza tuberculata</i>   | 37.0  | 170.0 | 0.2 |
| <i>Crambione cookii</i>          | 57.9  | 110.0 | 0.5 |
| <i>Crambione cookii</i>          | 55.0  | 110.0 | 0.5 |
| <i>Craspedacusta sowerbyi</i>    | 7.4   | 20.0  | 0.4 |
| <i>Crossota alba</i>             | 28.0  | 42.0  | 0.7 |
| <i>Crossota brunnea</i>          | 22.0  | 30.0  | 0.7 |
| <i>Crossota norvegica</i>        | 18.0  | 20.0  | 0.9 |
| <i>Crossota rufobrunnea</i>      | 10.0  | 15.0  | 0.7 |
| <i>Crystallophyes amygdalina</i> | 5.7   | 2.3   | 2.5 |
| <i>Ctenaria ctenophora</i>       | 6.0   | 5.0   | 1.2 |
| <i>Cubaia aphrodite</i>          | 4.4   | 12.0  | 0.4 |
| <i>Cunina duplicata</i>          | 20.3  | 58.0  | 0.4 |
| <i>Cunina mucilaginoso</i>       | 30.0  | 65.0  | 0.5 |
| <i>Cunina octonaria</i>          | 2.2   | 6.0   | 0.4 |
| <i>Cunina oligotis</i>           | 10.0  | 10.0  | 1.0 |

|                                   |       |        |     |
|-----------------------------------|-------|--------|-----|
| <i>Cunina polygonia</i>           | 6.0   | 16.0   | 0.4 |
| <i>Cunissa polyphera</i>          | 10.0  | 30.0   | 0.3 |
| <i>Cunissa polyporpa</i>          | 10.0  | 20.0   | 0.5 |
| <i>Cuvieria carisochroma</i>      | 13.0  | 35.0   | 0.4 |
| <i>Cuvieria huxleyi</i>           | 4.0   | 16.0   | 0.3 |
| <i>Cyanea annaskala</i>           | 25.0  | 200.0  | 0.1 |
| <i>Cyanea arctica</i>             | 200.0 | 800.0  | 0.3 |
| <i>Cyanea capillata</i>           | 300.0 | 1200.0 | 0.3 |
| <i>Cyanea capillata nozakii</i>   | 52.0  | 260.0  | 0.2 |
| <i>Cyanea ferruginea</i>          | 112.5 | 450.0  | 0.3 |
| <i>Cyanea fulva</i>               | 50.0  | 200.0  | 0.3 |
| <i>Cyanea lamarckii</i>           | 75.0  | 300.0  | 0.3 |
| <i>Cyanea versicolor</i>          | 27.5  | 110.0  | 0.3 |
| <i>Cytaeis pusilla</i>            | 4.0   | 3.0    | 1.3 |
| <i>Cytaeis tetrastyla</i>         | 6.0   | 5.0    | 1.2 |
| <i>Cytaeis vulgaris</i>           | 5.0   | 3.5    | 1.4 |
| <i>Dactylometra ferruginaster</i> | 28.6  | 100.0  | 0.3 |
| <i>Dactylometra longicirra</i>    | 25.0  | 75.0   | 0.3 |
| <i>Dendronema stylodendron</i>    | 9.0   | 6.0    | 1.5 |
| <i>Desmonema chierchiana</i>      | 100.0 | 310.0  | 0.3 |
| <i>Dichotomia cannoides</i>       | 8.0   | 6.0    | 1.3 |
| <i>Dicodonium adriaticum</i>      | 4.0   | 3.5    | 1.1 |
| <i>Dicodonium cornutum</i>        | 4.0   | 4.0    | 1.0 |
| <i>Dicodonium floridanum</i>      | 4.0   | 3.0    | 1.3 |
| <i>Dicodonium jeffersoni</i>      | 0.8   | 0.5    | 1.5 |
| <i>Dicodonium ocellatum</i>       | 5.0   | 4.5    | 1.1 |
| <i>Dimophyes arctica</i>          | 8.8   | 4.7    | 1.9 |
| <i>Diphyes antarctica</i>         | 29.0  | 12.9   | 2.3 |
| <i>Diphyes bojani</i>             | 6.4   | 2.2    | 2.8 |
| <i>Diphyes chamissonis</i>        | 8.6   | 3.9    | 2.2 |
| <i>Diphyes dispar</i>             | 12.4  | 5.5    | 2.3 |
| <i>Dipleuorsoma ochraceum</i>     | 3.0   | 8.0    | 0.4 |
| <i>Dipleuorsoma typicum</i>       | 10.0  | 27.0   | 0.4 |
| <i>Dipleurosoma gemmifera</i>     | 2.0   | 3.0    | 0.7 |
| <i>Dipurena halterata</i>         | 8.0   | 6.0    | 1.3 |
| <i>Dipurena pyramis</i>           | 5.0   | 5.0    | 1.0 |
| <i>Dipurena strangulata</i>       | 3.0   | 3.7    | 0.8 |
| <i>Discomedusa lobata</i>         | 40.0  | 150.0  | 0.3 |
| <i>Dissonema gaussi</i>           | 5.0   | 5.0    | 1.0 |
| <i>Dissonema saphenella</i>       | 6.0   | 4.0    | 1.5 |
| <i>Ectopleuro dumortieri</i>      | 2.5   | 2.5    | 1.0 |
| <i>Eirene gibbosa</i>             | 27.0  | 25.0   | 1.1 |
| <i>Eirene gibbosa</i>             | 13.0  | 35.0   | 0.4 |
| <i>Eirene viridula</i>            | 12.5  | 25.0   | 0.5 |
| <i>Eleutheria claparedei</i>      | 0.4   | 0.5    | 0.8 |
| <i>Eleutheria dicotoma</i>        | 0.3   | 0.5    | 0.6 |
| <i>Enneagonum hyalinum</i>        | 6.8   | 8.2    | 0.8 |
| <i>Eperetmus typus</i>            | 15.0  | 23.0   | 0.7 |
| <i>Erenna richardi</i>            | 33.6  | 31.4   | 1.1 |
| <i>Eucheilota maasi</i>           | 3.0   | 4.0    | 0.8 |
| <i>Eucheilota maculata</i>        | 10.0  | 13.0   | 0.8 |
| <i>Eucheilota menoni</i>          | 1.3   | 2.5    | 0.5 |
| <i>Eucheilota tropica</i>         | 1.5   | 4.0    | 0.4 |
| <i>Eucheilota ventricularis</i>   | 5.0   | 10.0   | 0.5 |
| <i>Eucodonium brownei</i>         | 1.0   | 1.0    | 1.0 |
| <i>Eudoxoides mitra</i>           | 8.0   | 3.0    | 2.6 |
| <i>Eudoxoides spiralis</i>        | 4.8   | 2.2    | 2.1 |
| <i>Eugymnanthea inequilina</i>    | 0.6   | 0.6    | 1.0 |
| <i>Eumedusa birulai</i>           | 13.0  | 10.0   | 1.3 |
| <i>Euphysa australis</i>          | 2.5   | 1.7    | 1.5 |
| <i>Euphysa flammea</i>            | 12.0  | 7.0    | 1.7 |
| <i>Euphysa sp</i>                 | 1.0   | 0.8    | 1.3 |
| <i>Euphysa tetrabrachia</i>       | 4.0   | 2.0    | 2.0 |

|                                  |      |       |     |
|----------------------------------|------|-------|-----|
| <i>Euphysilla pyramidata</i>     | 2.3  | 2.3   | 1.0 |
| <i>Euphysora annulata</i>        | 2.0  | 1.4   | 1.4 |
| <i>Euphysora furcata</i>         | 8.0  | 6.5   | 1.2 |
| <i>Euphysora gigantea</i>        | 26.0 | 26.0  | 1.0 |
| <i>Euphysora normani</i>         | 2.5  | 1.3   | 2.0 |
| <i>Euphysora valdiviae</i>       | 6.5  | 5.0   | 1.3 |
| <i>Eupilema scapulare</i>        | 50.0 | 150.0 | 0.3 |
| <i>Eutiara mayeri</i>            | 18.0 | 14.0  | 1.3 |
| <i>Eutima coerulea</i>           | 9.0  | 10.0  | 0.9 |
| <i>Eutima cuculata</i>           | 2.8  | 8.0   | 0.4 |
| <i>Eutima gegenbauri</i>         | 7.4  | 20.0  | 0.4 |
| <i>Eutima gentiana</i>           | 10.0 | 8.0   | 1.3 |
| <i>Eutima gracilis</i>           | 6.5  | 13.0  | 0.5 |
| <i>Eutima hartlaubi</i>          | 5.6  | 15.0  | 0.4 |
| <i>Eutima levuka</i>             | 5.6  | 15.0  | 0.4 |
| <i>Eutima mira</i>               | 30.0 | 30.0  | 1.0 |
| <i>Eutima modesta</i>            | 2.8  | 8.0   | 0.4 |
| <i>Eutima variabilis</i>         | 10.0 | 30.0  | 0.3 |
| <i>Eutimalphes pretiosa</i>      | 20.0 | 40.0  | 0.5 |
| <i>Eutonina indicans</i>         | 11.1 | 30.0  | 0.4 |
| <i>Eutonina scintillans</i>      | 5.0  | 10.0  | 0.5 |
| <i>Floresca parthenia</i>        | 30.0 | 50.0  | 0.6 |
| <i>Forskalia edwardsi</i>        | 5.5  | 5.2   | 1.1 |
| <i>Forskalia leuckarti</i>       | 8.0  | 8.3   | 1.0 |
| <i>Gastroblasta timida</i>       | 1.3  | 3.5   | 0.4 |
| <i>Geryonia proboscidalis</i>    | 28.5 | 57.0  | 0.5 |
| <i>Gilia reticulata</i>          | 4.4  | 2.5   | 1.8 |
| <i>Gonionemus vertens</i>        | 6.5  | 17.5  | 0.4 |
| <i>Gonionemus vindobonensis</i>  | 1.2  | 1.6   | 0.8 |
| <i>Gossea corynetes</i>          | 10.0 | 12.0  | 0.8 |
| <i>Gotoea similis</i>            | 3.5  | 3.0   | 1.2 |
| <i>Gotoea typica</i>             | 3.3  | 2.8   | 1.2 |
| <i>Halimedusa typus</i>          | 16.0 | 13.0  | 1.2 |
| <i>Haliscera bigelowi</i>        | 9.5  | 16.0  | 0.6 |
| <i>Haliscera racovitzae</i>      | 4.0  | 8.0   | 0.5 |
| <i>Halistaura cellularia</i>     | 35.0 | 70.0  | 0.5 |
| <i>Halistemma rubrum</i>         | 15.0 | 17.5  | 0.9 |
| <i>Halistemma striata</i>        | 7.2  | 8.0   | 0.9 |
| <i>Halitholus cirratus</i>       | 16.0 | 14.0  | 1.1 |
| <i>Halitholus intermedius</i>    | 9.5  | 7.0   | 1.4 |
| <i>Halitholus pauper</i>         | 10.0 | 9.0   | 1.1 |
| <i>Halopsis ocellata</i>         | 14.4 | 57.5  | 0.3 |
| <i>Haplorhiza punctata</i>       | 19.0 | 40.0  | 0.5 |
| <i>Haplorhiza simplex</i>        | 20.0 | 40.0  | 0.5 |
| <i>Helgicirrha cari</i>          | 13.1 | 35.5  | 0.4 |
| <i>Helgicirrha schulzei</i>      | 13.0 | 35.0  | 0.4 |
| <i>Heteropyramis crystallina</i> | 6.1  | 2.7   | 2.2 |
| <i>Heteropyramis maculata</i>    | 5.3  | 3.0   | 1.8 |
| <i>Heterotiara minor</i>         | 10.0 | 9.0   | 1.1 |
| <i>Hippopodius hippopus</i>      | 5.1  | 5.3   | 1.0 |
| <i>Homoenema platygonon</i>      | 1.5  | 1.5   | 1.0 |
| <i>Hybocondon atentaculatus</i>  | 23.0 | 25.0  | 0.9 |
| <i>Hybocondon prolifer</i>       | 4.0  | 3.0   | 1.3 |
| <i>Hybocondon unicus</i>         | 3.0  | 2.0   | 1.5 |
| <i>Hydrocoryne miurensis</i>     | 1.3  | 1.0   | 1.3 |
| <i>Irenium quadrigatum</i>       | 8.0  | 15.0  | 0.5 |
| <i>Irenium teuscheri</i>         | 20.0 | 40.0  | 0.5 |
| <i>Kanaka pelagica</i>           | 1.8  | 1.5   | 1.2 |
| <i>Koellikerina fasciculata</i>  | 8.0  | 9.0   | 0.9 |
| <i>Koellikerina maasi</i>        | 10.0 | 9.0   | 1.1 |
| <i>Koellikerina multicerrata</i> | 3.0  | 3.0   | 1.0 |
| <i>Koellikerina octonemalis</i>  | 5.5  | 4.5   | 1.2 |
| <i>Krampella dubia</i>           | 1.5  | 3.0   | 0.5 |

|                                   |      |       |     |
|-----------------------------------|------|-------|-----|
| <i>Kuragea depressa</i>           | 30.0 | 85.0  | 0.4 |
| <i>Laodicea chapmani</i>          | 12.0 | 17.0  | 0.7 |
| <i>Laodicea eucope</i>            | 2.5  | 5.0   | 0.5 |
| <i>Laodicea fertilis</i>          | 2.5  | 2.0   | 1.3 |
| <i>Laodicea fijiana</i>           | 4.5  | 16.0  | 0.3 |
| <i>Laodicea indica</i>            | 7.4  | 20.0  | 0.4 |
| <i>Laodicea neptuna</i>           | 1.3  | 2.5   | 0.5 |
| <i>Laodicea pulchra</i>           | 15.0 | 25.0  | 0.6 |
| <i>Laodicea undulata</i>          | 13.7 | 37.0  | 0.4 |
| <i>Lensia achilles</i>            | 14.3 | 6.9   | 2.1 |
| <i>Lensia ajax</i>                | 6.5  | 3.6   | 1.8 |
| <i>Lensia campanella</i>          | 3.2  | 1.7   | 1.9 |
| <i>Lensia conoidea</i>            | 13.1 | 5.6   | 2.3 |
| <i>Lensia cossack</i>             | 5.5  | 2.6   | 2.1 |
| <i>Lensia exeter</i>              | 7.2  | 4.2   | 1.7 |
| <i>Lensia fowleri</i>             | 10.6 | 4.0   | 2.6 |
| <i>Lensia grimaldi</i>            | 5.5  | 2.7   | 2.0 |
| <i>Lensia hardy</i>               | 11.9 | 4.7   | 2.5 |
| <i>Lensia havock</i>              | 8.9  | 4.9   | 1.8 |
| <i>Lensia hostile</i>             | 8.1  | 3.6   | 2.3 |
| <i>Lensia hotspur</i>             | 6.1  | 3.4   | 1.8 |
| <i>Lensia hunter</i>              | 8.4  | 4.6   | 1.8 |
| <i>Lensia leloupi</i>             | 4.7  | 3.0   | 1.6 |
| <i>Lensia lelouveteau</i>         | 4.7  | 2.9   | 1.6 |
| <i>Lensia meteori</i>             | 4.0  | 1.9   | 2.0 |
| <i>Lensia multicristata</i>       | 9.5  | 4.0   | 2.4 |
| <i>Lensia subtilis</i>            | 6.4  | 3.3   | 1.9 |
| <i>Lensia subtiloides</i>         | 4.3  | 2.4   | 1.8 |
| <i>Leptobrachia leptopus</i>      | 29.6 | 80.0  | 0.4 |
| <i>Leuckartiara annexa</i>        | 11.0 | 9.0   | 1.2 |
| <i>Leuckartiara brevicornis</i>   | 45.0 | 35.0  | 1.3 |
| <i>Leuckartiara gardineri</i>     | 6.0  | 3.5   | 1.7 |
| <i>Leuckartiara grimaldii</i>     | 16.0 | 12.0  | 1.3 |
| <i>Leuckartiara hoepplii</i>      | 14.5 | 7.5   | 1.9 |
| <i>Leuckartiara nobilis</i>       | 27.0 | 20.0  | 1.4 |
| <i>Leuckartiara zacaе</i>         | 21.0 | 18.0  | 1.2 |
| <i>Lilyopsis rosea</i>            | 9.1  | 5.3   | 1.7 |
| <i>Limnocnida indica</i>          | 5.0  | 15.0  | 0.3 |
| <i>Linuche aquila</i>             | 13.0 | 16.0  | 0.8 |
| <i>Linuche unguiculata</i>        | 13.0 | 16.0  | 0.8 |
| <i>Liriope tetraphylla</i>        | 10.0 | 20.0  | 0.5 |
| <i>Lizzella hylania</i>           | 4.0  | 6.0   | 0.7 |
| <i>Lizzella octella</i>           | 15.0 | 10.0  | 1.5 |
| <i>Lizzia blondina</i>            | 2.0  | 2.0   | 1.0 |
| <i>Lizzia elisabethae</i>         | 6.0  | 4.0   | 1.5 |
| <i>Lizzia gracilis</i>            | 2.9  | 3.0   | 1.0 |
| <i>Lizzia octostyla</i>           | 0.4  | 0.5   | 0.8 |
| <i>Lobonema smithii</i>           | 87.3 | 236.0 | 0.4 |
| <i>Lorifera flagellata</i>        | 70.0 | 200.0 | 0.4 |
| <i>Lorifera lorifera pacifica</i> | 55.0 | 200.0 | 0.3 |
| <i>Lovenella annae</i>            | 2.5  | 5.0   | 0.5 |
| <i>Lovenella assimilis</i>        | 2.6  | 2.5   | 1.0 |
| <i>Lovenella chiquitita</i>       | 0.3  | 0.4   | 0.8 |
| <i>Lovenella cirrata</i>          | 8.0  | 16.0  | 0.5 |
| <i>Lovenella clausa</i>           | 3.5  | 7.0   | 0.5 |
| <i>Lychnorhiza bartschi</i>       | 30.9 | 74.0  | 0.4 |
| <i>Lychnorhiza lucerna</i>        | 55.5 | 150.0 | 0.4 |
| <i>Lynchnorhiza lucerna</i>       | 30.0 | 80.0  | 0.4 |
| <i>Maeotias inexpectata</i>       | 24.0 | 39.0  | 0.6 |
| <i>Maresearsia praeclara</i>      | 12.9 | 17.5  | 0.7 |
| <i>Margelopsis australis</i>      | 2.0  | 2.0   | 1.0 |
| <i>Margelopsis hartlaubi</i>      | 3.0  | 3.0   | 1.0 |
| <i>Marrus antarcticus</i>         | 3.6  | 3.8   | 1.0 |

|                                |      |      |     |
|--------------------------------|------|------|-----|
| <i>Mastigias gracile</i>       | 12.3 | 35.0 | 0.4 |
| <i>Mastigias pupua</i>         | 37.1 | 80.0 | 0.5 |
| <i>Mastigias pupua siderea</i> | 24.5 | 70.0 | 0.4 |
| <i>Meator rubatra</i>          | 17.0 | 18.0 | 0.9 |
| <i>Melicertissa adriatica</i>  | 17.0 | 46.0 | 0.4 |
| <i>Melicertissa clavigera</i>  | 3.7  | 10.0 | 0.4 |
| <i>Melicertissa mayeri</i>     | 2.6  | 7.0  | 0.4 |
| <i>Melicertum georgicum</i>    | 20.0 | 20.0 | 1.0 |
| <i>Melicertum panocto</i>      | 10.0 | 8.0  | 1.3 |
| <i>Merga reesi</i>             | 10.0 | 10.0 | 1.0 |
| <i>Merga tergestina</i>        | 7.0  | 4.0  | 1.8 |
| <i>Merga violacea</i>          | 11.0 | 7.0  | 1.6 |
| <i>Mitrocoma annae</i>         | 13.0 | 35.0 | 0.4 |
| <i>Mitrocoma discoidea</i>     | 16.7 | 45.0 | 0.4 |
| <i>Mitrocomella cruciata</i>   | 22.5 | 45.0 | 0.5 |
| <i>Mitrocomella frigida</i>    | 7.5  | 15.0 | 0.5 |
| <i>Moerisia gangetica</i>      | 2.0  | 3.0  | 0.7 |
| <i>Moerisia lyonsi</i>         | 4.0  | 4.5  | 0.9 |
| <i>Moerisia pallasii</i>       | 3.5  | 3.0  | 1.2 |
| <i>Muggiaea atlantica</i>      | 9.6  | 4.6  | 2.1 |
| <i>Muggiaea bargmannae</i>     | 9.8  | 5.5  | 1.8 |
| <i>Muggiaea kochi</i>          | 4.8  | 2.6  | 1.9 |
| <i>Nanomia bijuga</i>          | 3.3  | 3.3  | 1.0 |
| <i>Nausithoe albatrossi</i>    | 35.0 | 40.0 | 0.9 |
| <i>Nausithoe clausi</i>        | 3.0  | 9.0  | 0.3 |
| <i>Nectadamas diomedea</i>     | 29.2 | 32.7 | 0.9 |
| <i>Nectopyramis natans</i>     | 29.5 | 10.5 | 2.8 |
| <i>Nectopyramis thetis</i>     | 9.4  | 9.4  | 1.0 |
| <i>Nemopsis dofleini</i>       | 13.0 | 10.0 | 1.3 |
| <i>Nemopsis heteronema</i>     | 12.0 | 10.0 | 1.2 |
| <i>Neoturris crockeri</i>      | 28.0 | 32.0 | 0.9 |
| <i>Neoturris papua</i>         | 11.0 | 6.2  | 1.8 |
| <i>Neoturris pelagica</i>      | 16.0 | 9.0  | 1.8 |
| <i>Neoturris pileata</i>       | 40.0 | 25.0 | 1.6 |
| <i>Obelia spp.</i>             | 1.8  | 6.0  | 0.3 |
| <i>Oceania armata</i>          | 9.0  | 9.0  | 1.0 |
| <i>Octcannoides ocellata</i>   | 2.2  | 6.0  | 0.4 |
| <i>Octorathkea onoi</i>        | 1.5  | 1.5  | 1.0 |
| <i>Octphialucium bigelowi</i>  | 10.0 | 8.0  | 1.3 |
| <i>Odessia maeotica</i>        | 18.0 | 18.0 | 1.0 |
| <i>Olindias phosphorica</i>    | 15.0 | 30.0 | 0.5 |
| <i>Olindias singularis</i>     | 10.0 | 20.0 | 0.5 |
| <i>Ostromovia inkermanica</i>  | 5.5  | 6.5  | 0.8 |
| <i>Pachycordyle conica</i>     | 1.2  | 1.0  | 1.2 |
| <i>Pachycordyle degenerata</i> | 0.8  | 0.3  | 2.5 |
| <i>Pachycordyle globulosa</i>  | 1.0  | 1.0  | 1.0 |
| <i>Pachycordyle lineata</i>    | 0.5  | 0.5  | 1.0 |
| <i>Pachycordyle weismanni</i>  | 2.0  | 1.3  | 1.5 |
| <i>Palephyra antiqua</i>       | 8.0  | 20.0 | 0.4 |
| <i>Palephyra pelagica</i>      | 2.0  | 12.0 | 0.2 |
| <i>Pandea conica</i>           | 21.0 | 10.0 | 2.1 |
| <i>Pandea minima</i>           | 3.0  | 2.0  | 1.5 |
| <i>Pandea rubra</i>            | 75.0 | 75.0 | 1.0 |
| <i>Pantachogon haeckeli</i>    | 12.0 | 12.0 | 1.0 |
| <i>Pantachogon militare</i>    | 6.0  | 8.5  | 0.7 |
| <i>Paragotoea bathybia</i>     | 2.0  | 3.0  | 0.7 |
| <i>Paraphyllina intermedia</i> | 8.0  | 15.0 | 0.5 |
| <i>Paratiara digitalis</i>     | 10.0 | 5.0  | 2.0 |
| <i>Pegantha aureola</i>        | 8.0  | 30.0 | 0.3 |
| <i>Pegantha biloba</i>         | 6.0  | 25.0 | 0.2 |
| <i>Pegantha clara</i>          | 20.0 | 50.0 | 0.4 |
| <i>Pegantha cyanostylis</i>    | 25.0 | 45.0 | 0.6 |
| <i>Pegantha dodecagona</i>     | 12.0 | 40.0 | 0.3 |

|                                      |       |       |     |
|--------------------------------------|-------|-------|-----|
| <i>Pegantha forskali</i>             | 7.0   | 20.0  | 0.4 |
| <i>Pegantha laevis</i>               | 14.8  | 40.0  | 0.4 |
| <i>Pegantha lunulata</i>             | 4.5   | 18.0  | 0.3 |
| <i>Pegantha magnifica</i>            | 12.0  | 50.0  | 0.2 |
| <i>Pegantha mollicina</i>            | 13.0  | 40.0  | 0.3 |
| <i>Pegantha pantheon</i>             | 10.0  | 20.0  | 0.5 |
| <i>Pegantha punctata</i>             | 25.0  | 90.0  | 0.3 |
| <i>Pegantha quadriloba</i>           | 7.0   | 20.0  | 0.4 |
| <i>Pegantha sieboldi</i>             | 10.0  | 20.0  | 0.5 |
| <i>Pegantha triloba</i>              | 11.1  | 30.0  | 0.4 |
| <i>Pegantha weberi</i>               | 16.0  | 50.0  | 0.3 |
| <i>Pegantha zonaria</i>              | 4.0   | 12.0  | 0.3 |
| <i>Pegantha zonorchis</i>            | 4.0   | 16.0  | 0.3 |
| <i>Pelagia crassa</i>                | 13.0  | 35.0  | 0.4 |
| <i>Pelagia cyanella</i>              | 40.0  | 50.0  | 0.8 |
| <i>Pelagia denticulata</i>           | 50.0  | 60.0  | 0.8 |
| <i>Pelagia discoidea</i>             | 20.0  | 80.0  | 0.3 |
| <i>Pelagia flaveola</i>              | 15.0  | 30.0  | 0.5 |
| <i>Pelagia minuta</i>                | 6.0   | 25.0  | 0.2 |
| <i>Pelagia neglecta</i>              | 28.0  | 60.0  | 0.5 |
| <i>Pelagia noctiluca</i>             | 32.0  | 60.0  | 0.5 |
| <i>Pelagia panopyra</i>              | 30.0  | 50.0  | 0.6 |
| <i>Pelagia perla</i>                 | 50.0  | 60.0  | 0.8 |
| <i>Pelagia phosphora</i>             | 30.0  | 50.0  | 0.6 |
| <i>Pelagia placenta</i>              | 12.0  | 40.0  | 0.3 |
| <i>Pennaria adamsia female</i>       | 1.5   | 1.5   | 1.0 |
| <i>Pennaria adamsia male</i>         | 1.5   | 0.7   | 2.1 |
| <i>Pennaria armata</i>               | 1.7   | 1.7   | 1.0 |
| <i>Pennaria grandis</i>              | 5.0   | 4.5   | 1.1 |
| <i>Pennaria pauper</i>               | 7.2   | 3.7   | 1.9 |
| <i>Pennaria rosea</i>                | 2.0   | 1.0   | 2.0 |
| <i>Pericolpa campana</i>             | 15.0  | 15.0  | 1.0 |
| <i>Pericolpa quadrigata</i>          | 40.0  | 30.0  | 1.3 |
| <i>Pericolpa tetralina</i>           | 20.0  | 16.0  | 1.3 |
| <i>Periphylla hyacinthina</i>        | 80.0  | 42.0  | 1.9 |
| <i>Periphylla hyacinthina dode</i>   | 70.0  | 100.0 | 0.7 |
| <i>Periphylla hyacinthina regina</i> | 100.0 | 150.0 | 0.7 |
| <i>Periphyllopsis braueri</i>        | 25.0  | 60.0  | 0.4 |
| <i>Persa incolorata</i>              | 2.0   | 3.0   | 0.7 |
| <i>Petasis atavus</i>                | 1.0   | 1.0   | 1.0 |
| <i>Petasis digonimus</i>             | 1.0   | 1.0   | 1.0 |
| <i>Petasis eucope</i>                | 5.0   | 10.0  | 0.5 |
| <i>Phacellophora sicula</i>          | 55.0  | 155.0 | 0.4 |
| <i>Phialella annulata</i>            | 2.5   | 2.0   | 1.3 |
| <i>Phialella dissonema</i>           | 7.0   | 5.0   | 1.4 |
| <i>Phialella fragilis</i>            | 10.5  | 5.5   | 1.9 |
| <i>Phialella quadrata</i>            | 6.5   | 13.0  | 0.5 |
| <i>Phialidium bicophorum</i>         | 2.2   | 5.5   | 0.4 |
| <i>Phialidium brunescens</i>         | 0.7   | 2.0   | 0.4 |
| <i>Phialidium chengshanense</i>      | 1.4   | 4.0   | 0.4 |
| <i>Phialidium discoidum</i>          | 2.0   | 4.0   | 0.5 |
| <i>Phialidium folleatum</i>          | 1.9   | 5.0   | 0.4 |
| <i>Phialidium gardineri</i>          | 1.8   | 5.0   | 0.4 |
| <i>Phialidium gelatinosum</i>        | 7.0   | 3.3   | 2.1 |
| <i>Phialidium gregarium</i>          | 6.0   | 12.0  | 0.5 |
| <i>Phialidium hemisphaericum</i>     | 7.4   | 20.0  | 0.4 |
| <i>Phialidium languidum</i>          | 6.4   | 17.3  | 0.4 |
| <i>Phialidium lomae</i>              | 3.5   | 14.0  | 0.3 |
| <i>Phialidium mccradyi</i>           | 7.5   | 15.0  | 0.5 |
| <i>Phialidium pacificum</i>          | 3.0   | 6.0   | 0.5 |
| <i>Phialidium rangiroae</i>          | 2.6   | 7.0   | 0.4 |
| <i>Phialidium simplex</i>            | 10.0  | 22.0  | 0.5 |
| <i>Phialopsis diegensis</i>          | 7.1   | 25.0  | 0.3 |



|                                     |       |       |     |
|-------------------------------------|-------|-------|-----|
| <i>Phialucium carolinae</i>         | 6.3   | 17.0  | 0.4 |
| <i>Phialucium mbenga</i>            | 3.9   | 10.5  | 0.4 |
| <i>Phialucium multitentaculatum</i> | 11.0  | 14.0  | 0.8 |
| <i>Phyllorhiza punctata</i>         | 50.0  | 500.0 | 0.1 |
| <i>Physophora hydrostatica</i>      | 15.5  | 14.8  | 1.0 |
| <i>Plotocnide borealis</i>          | 3.0   | 2.9   | 1.0 |
| <i>Plotocnide incerta</i>           | 3.0   | 2.9   | 1.0 |
| <i>Pochella oligonema</i>           | 2.0   | 2.0   | 1.0 |
| <i>Podocoryne apicata</i>           | 1.2   | 1.0   | 1.2 |
| <i>Podocoryne borealis</i>          | 5.0   | 5.0   | 1.0 |
| <i>Podocoryne dubia</i>             | 1.5   | 1.5   | 1.0 |
| <i>Podocoryne hartlaubi</i>         | 3.5   | 3.5   | 1.0 |
| <i>Podocoryne meteoris</i>          | 1.3   | 1.8   | 0.7 |
| <i>Podocoryne ocellata</i>          | 4.0   | 4.0   | 1.0 |
| <i>Podocoryne polystyla</i>         | 1.5   | 1.5   | 1.0 |
| <i>Podocoryne simplex</i>           | 0.8   | 0.8   | 1.0 |
| <i>Podocoryne tennuis</i>           | 2.0   | 1.5   | 1.3 |
| <i>Polyorchis karafutoensis</i>     | 60.0  | 50.0  | 1.2 |
| <i>Polyorchis pencillatus</i>       | 55.0  | 35.0  | 1.6 |
| <i>Praya dubia</i>                  | 40.7  | 15.0  | 2.7 |
| <i>Praya reticulata</i>             | 54.0  | 22.0  | 2.5 |
| <i>Proboscidactyla abyssicola</i>   | 10.0  | 20.0  | 0.5 |
| <i>Proboscidactyla flavicirrata</i> | 10.0  | 12.0  | 0.8 |
| <i>Proboscidactyla mutabilis</i>    | 6.0   | 6.0   | 1.0 |
| <i>Proboscidactyla pacifica</i>     | 2.5   | 6.0   | 0.4 |
| <i>Proboscidactyla stellata</i>     | 8.0   | 9.0   | 0.9 |
| <i>Procharybdis tetraptera</i>      | 30.0  | 20.0  | 1.5 |
| <i>Propachycordyle canalifera</i>   | 2.0   | 1.5   | 1.3 |
| <i>Protiara haeckeli</i>            | 3.0   | 1.5   | 2.0 |
| <i>Protiara tetranema</i>           | 4.0   | 4.0   | 1.0 |
| <i>Protiara tropica</i>             | 9.0   | 9.0   | 1.0 |
| <i>Pseudorhiza aurosa</i>           | 130.0 | 400.0 | 0.3 |
| <i>Pseudorhiza haeckelii</i>        | 100.0 | 250.0 | 0.4 |
| <i>Pteronema darwini</i>            | 6.0   | 4.0   | 1.5 |
| <i>Ptychogena aurea</i>             | 10.0  | 11.3  | 0.9 |
| <i>Ptychogena hyperborea</i>        | 8.0   | 15.0  | 0.5 |
| <i>Ptychogena lactea</i>            | 30.0  | 90.0  | 0.3 |
| <i>Ptychogena longigona</i>         | 8.8   | 25.0  | 0.4 |
| <i>Ptyochgastria asteroides</i>     | 1.7   | 4.5   | 0.4 |
| <i>Pyrostephos vanhoeffeni</i>      | 14.8  | 14.2  | 1.0 |
| <i>Ransonia krampi</i>              | 15.0  | 8.0   | 1.9 |
| <i>Rathkea africana</i>             | 1.7   | 1.2   | 1.4 |
| <i>Rathkea formosissima</i>         | 3.0   | 2.5   | 1.2 |
| <i>Rathkea octopunctata</i>         | 3.5   | 3.3   | 1.1 |
| <i>Rathkea rubence</i>              | 1.5   | 1.0   | 1.5 |
| <i>Rhacostoma atlanticum</i>        | 100.0 | 350.0 | 0.3 |
| <i>Rhizostoma pulmo</i>             | 348.4 | 600.0 | 0.6 |
| <i>Rhopalonema funerarium</i>       | 14.0  | 17.0  | 0.8 |
| <i>Rhopalonema velatum</i>          | 3.3   | 9.0   | 0.4 |
| <i>Rhopilema esculenta</i>          | 50.0  | 450.0 | 0.1 |
| <i>Rhopilema hispidum</i>           | 170.0 | 340.0 | 0.5 |
| <i>Rhopilema verrillii</i>          | 72.9  | 350.0 | 0.2 |
| <i>Rosacea cymbiformis</i>          | 6.4   | 3.7   | 1.7 |
| <i>Rosacea plicata</i>              | 28.8  | 15.8  | 1.8 |
| <i>Russellia mirabilis</i>          | 15.0  | 9.0   | 1.7 |
| <i>Sanderia malayensis</i>          | 23.6  | 90.0  | 0.3 |
| <i>Sarsia barentsi</i>              | 3.5   | 3.0   | 1.2 |
| <i>Sarsia brachygaster</i>          | 16.5  | 9.0   | 1.8 |
| <i>Sarsia brevia</i>                | 0.7   | 0.8   | 0.9 |
| <i>Sarsia coccometra</i>            | 5.0   | 4.0   | 1.3 |
| <i>Sarsia conica</i>                | 12.0  | 4.0   | 3.0 |
| <i>Sarsia eximia</i>                | 3.5   | 2.0   | 1.8 |
| <i>Sarsia gracilis</i>              | 5.0   | 3.0   | 1.7 |

|                                       |       |       |     |
|---------------------------------------|-------|-------|-----|
| <i>Sarsia hargitti</i>                | 1.5   | 1.0   | 1.5 |
| <i>Sarsia inabai</i>                  | 5.8   | 3.0   | 1.9 |
| <i>Sarsia minima</i>                  | 3.0   | 2.5   | 1.2 |
| <i>Sarsia nipponica</i>               | 1.2   | 0.9   | 1.3 |
| <i>Sarsia polyocellata</i>            | 2.0   | 2.2   | 0.9 |
| <i>Sarsia radiata</i>                 | 3.0   | 2.5   | 1.2 |
| <i>Sarsia resplendens</i>             | 2.2   | 2.0   | 1.1 |
| <i>Sarsia reticulata</i>              | 4.0   | 3.5   | 1.1 |
| <i>Sarsia rosaria</i>                 | 22.5  | 12.5  | 1.8 |
| <i>Sarsia siphonophora</i>            | 8.0   | 6.0   | 1.3 |
| <i>Sarsiella dinema</i>               | 3.0   | 2.0   | 1.5 |
| <i>Scolionema suvaense</i>            | 6.0   | 9.0   | 0.7 |
| <i>Sibogita geometrica</i>            | 38.0  | 20.0  | 1.9 |
| <i>Sibogita geometrica occident</i>   | 30.0  | 40.0  | 0.8 |
| <i>Smithea eurygaster</i>             | 3.0   | 6.0   | 0.5 |
| <i>Solmissus albescens</i>            | 9.6   | 27.5  | 0.4 |
| <i>Solmissus bleekii</i>              | 10.0  | 40.0  | 0.3 |
| <i>Solmissus faberi</i>               | 7.0   | 20.0  | 0.4 |
| <i>Solmissus incisa</i>               | 35.0  | 100.0 | 0.4 |
| <i>Solmissus marshalli</i>            | 21.7  | 62.0  | 0.4 |
| <i>Somaris corona</i>                 | 4.7   | 13.5  | 0.4 |
| <i>Somaris flavescens</i>             | 6.7   | 19.0  | 0.4 |
| <i>Somaris lenticula</i>              | 3.0   | 5.0   | 0.6 |
| <i>Somaris leucostyla</i>             | 1.5   | 3.0   | 0.5 |
| <i>Somaris rhodoloma</i>              | 0.9   | 4.5   | 0.2 |
| <i>Somaris solmaris</i>               | 12.3  | 35.0  | 0.4 |
| <i>Somaris vanhoeffeni</i>            | 1.0   | 0.5   | 2.0 |
| <i>Sphaeronectes gracilis</i>         | 6.2   | 4.6   | 1.3 |
| <i>Spirocodon saltator</i>            | 75.0  | 65.0  | 1.2 |
| <i>Stauraglaura tetragonima</i>       | 12.0  | 8.0   | 1.5 |
| <i>Stauridiosarsia producta</i>       | 10.0  | 7.0   | 1.4 |
| <i>Staurocladia charcoti</i>          | 1.0   | 4.0   | 0.3 |
| <i>Staurocladia vallentini</i>        | 2.0   | 3.0   | 0.7 |
| <i>Staurodiscus gotoi</i>             | 20.0  | 25.0  | 0.8 |
| <i>Staurodiscus tetrastaurus</i>      | 3.0   | 6.0   | 0.5 |
| <i>Staurophora mertensi</i>           | 55.5  | 150.0 | 0.4 |
| <i>Staurophora purpurea</i>           | 10.0  | 20.0  | 0.5 |
| <i>Steenstrupia nutans</i>            | 6.0   | 3.5   | 1.7 |
| <i>Stomolophus meleagris</i>          | 102.1 | 180.0 | 0.6 |
| <i>Stomolophus meleagris fritilla</i> | 60.0  | 80.0  | 0.8 |
| <i>Stomotoca atra</i>                 | 22.5  | 22.5  | 1.0 |
| <i>Stomotoca pterophylla</i>          | 11.0  | 25.0  | 0.4 |
| <i>Stylactis pruvoti</i>              | 1.0   | 0.7   | 1.5 |
| <i>Sulculeolaria turgida</i>          | 9.6   | 5.4   | 1.8 |
| <i>Sulculeolaria biloba</i>           | 12.1  | 6.9   | 1.8 |
| <i>Sulculeolaria chuni</i>            | 5.6   | 2.9   | 1.9 |
| <i>Sulculeolaria monoica</i>          | 7.2   | 4.0   | 1.8 |
| <i>Sulculeolaria quadrivalvis</i>     | 13.4  | 10.4  | 1.3 |
| <i>Tesserogastris musculosa</i>       | 2.0   | 2.0   | 1.0 |
| <i>Tetrochis erthrogaster</i>         | 8.0   | 11.0  | 0.7 |
| <i>Thamnostoma alexandri</i>          | 4.0   | 3.0   | 1.3 |
| <i>Thamnostoma dibalium</i>           | 7.0   | 6.0   | 1.2 |
| <i>Thamnostoma macrostomum</i>        | 8.0   | 8.0   | 1.0 |
| <i>Thamnostoma russelli</i>           | 1.6   | 1.3   | 1.3 |
| <i>Thamnostoma sp.</i>                | 1.3   | 1.3   | 1.0 |
| <i>Thamnostoma tetrellum</i>          | 6.0   | 4.0   | 1.5 |
| <i>Thyanostoma thysanura</i>          | 44.4  | 120.0 | 0.4 |
| <i>Tiaranna ikarii</i>                | 4.0   | 4.2   | 1.0 |
| <i>Tiaricodon coeruleus</i>           | 25.0  | 24.0  | 1.0 |
| <i>Tiaropsidium atlanticum</i>        | 22.2  | 60.0  | 0.4 |
| <i>Tiaropsidium japonicum</i>         | 6.7   | 18.0  | 0.4 |
| <i>Tiaropsidium kelsyi</i>            | 16.7  | 50.0  | 0.3 |
| <i>Tiaropsidium mediterraneum</i>     | 5.0   | 7.0   | 0.7 |

|                                 |      |       |     |
|---------------------------------|------|-------|-----|
| <i>Tiaropsidium roseum</i>      | 5.3  | 15.0  | 0.4 |
| <i>Tiaropsis multicirrata</i>   | 7.4  | 20.0  | 0.4 |
| <i>Tima bairdi</i>              | 28.8 | 57.5  | 0.5 |
| <i>Tima flavilabris</i>         | 25.9 | 70.0  | 0.4 |
| <i>Tima formosa</i>             | 65.0 | 100.0 | 0.7 |
| <i>Tima lucullana</i>           | 27.4 | 74.0  | 0.4 |
| <i>Timoides agassizi</i>        | 14.0 | 20.0  | 0.7 |
| <i>Toxorchis arcuatus</i>       | 2.6  | 6.0   | 0.4 |
| <i>Toxorchis kellneri</i>       | 7.5  | 15.0  | 0.5 |
| <i>Toxorchis polynema</i>       | 6.3  | 17.0  | 0.4 |
| <i>Tripedalia cystophora</i>    | 12.0 | 15.0  | 0.8 |
| <i>Turritopsis lata</i>         | 3.5  | 3.0   | 1.2 |
| <i>Turritopsis nutricula</i>    | 4.5  | 4.5   | 1.0 |
| <i>Undosa undulata</i>          | 40.0 | 120.0 | 0.3 |
| <i>Urashimea globosa</i>        | 10.0 | 8.5   | 1.2 |
| <i>Vallentinia falklandica</i>  | 3.0  | 2.0   | 1.5 |
| <i>Vallentinia gabriellae</i>   | 4.0  | 6.0   | 0.7 |
| <i>Versura anadyomene</i>       | 50.0 | 200.0 | 0.3 |
| <i>Versura maasi</i>            | 33.3 | 90.0  | 0.4 |
| <i>Versura palmata</i>          | 20.0 | 60.0  | 0.3 |
| <i>Versura pinnata</i>          | 24.0 | 80.0  | 0.3 |
| <i>Vogtia glabra</i>            | 5.7  | 7.2   | 0.8 |
| <i>Vogtia pentacantha</i>       | 6.6  | 10.9  | 0.6 |
| <i>Vogtia serrata</i>           | 14.1 | 19.1  | 0.7 |
| <i>Vogtia spinosa</i>           | 12.6 | 15.0  | 0.8 |
| <i>Zanclaea costata</i>         | 3.0  | 3.0   | 1.0 |
| <i>Zanclaea orientalis</i>      | 2.0  | 1.5   | 1.3 |
| <i>Zanclaeopsis dichotoma</i>   | 3.0  | 2.5   | 1.2 |
| <i>Zanclaeopsis tentaculata</i> | 4.5  | 2.8   | 1.6 |
| <i>Zygocanna buitendijki</i>    | 10.0 | 33.0  | 0.3 |
| <i>Zygocanna pleuornata</i>     | 9.0  | 25.0  | 0.4 |
| <i>Zygocanna purpurea</i>       | 13.0 | 90.0  | 0.1 |
| <i>Zygocanna vagans</i>         | 26.6 | 76.0  | 0.4 |

---
